1  
2  
3 **Rapid isolation and profiling of a diverse panel of human monoclonal antibodies targeting**  
4 **the SARS-CoV-2 spike protein**  
5

6 **AUTHORS:** Seth J. Zost<sup>1\*</sup>, Pavlo Gilchuk<sup>1\*</sup>, Rita E. Chen<sup>2,9</sup>, James Brett Case<sup>3</sup>, Joseph X.  
7 Reidy<sup>1</sup>, Andrew Trivette<sup>1</sup>, Rachel S. Nargi<sup>1</sup>, Rachel E. Sutton<sup>1</sup>, Naveenchandra  
8 Suryadevara<sup>1</sup>, Elaine C. Chen<sup>3</sup>, Elad Binshtein<sup>1</sup>, Swathi Shrihari<sup>9</sup>, Mario Ostrowski<sup>4</sup>,  
9 Helen Y. Chu<sup>5</sup>, Jonathan E. Didier<sup>6</sup>, Keith W. MacRenaris<sup>6</sup>, Taylor Jones<sup>1</sup>, Samuel Day<sup>1</sup>,  
10 Luke Myers<sup>1</sup>, F. Eun-Hyung Lee<sup>7</sup>, Doan C. Nguyen<sup>7</sup>, Ignacio Sanz<sup>7</sup>, David R. Martinez<sup>8</sup>,  
11 Ralph S. Baric<sup>8</sup>, Larissa B. Thackray<sup>9</sup>, Michael S. Diamond<sup>2,9,10,11</sup>, Robert H. Carnahan<sup>1,12\*\*</sup>,  
12 James E. Crowe, Jr.<sup>1,3,12\*\*</sup>

13  
14 **Affiliations:**

15 <sup>1</sup>Vanderbilt Vaccine Center, Vanderbilt University Medical Center, Nashville, TN, 37232,  
16 USA

17 <sup>2</sup>Department of Pathology & Immunology, Washington University School of Medicine,  
18 St. Louis, MO, 63110, USA

19 <sup>3</sup>Department of Pathology, Microbiology, and Immunology, Vanderbilt University Medical  
20 Center, Nashville, TN, 37232, USA

21 <sup>4</sup>Department of Medicine, University of Toronto, Toronto, ON, Canada

22 <sup>5</sup>Division of Allergy and Infectious Diseases, University of Washington, Seattle 98109, USA

23 <sup>6</sup>Berkeley Lights, Inc., Emeryville, CA, 94608, USA

24 <sup>7</sup>Department of Medicine, Emory University, Atlanta, GA, 30322 USA

25 <sup>8</sup> Department of Epidemiology, University of North Carolina at Chapel Hill, Chapel Hill,  
26 NC, 27599, USA

27 <sup>9</sup>Department of Medicine, Washington University School of Medicine, St. Louis, 63110,  
28 MO, USA

29 <sup>10</sup>Department of Molecular Microbiology, Washington University School of Medicine,  
30 St. Louis, MO, 63110, USA

31 <sup>11</sup>Andrew M. and Jane M. Bursky Center for Human Immunology and Immunotherapy  
32 Programs, Washington University School of Medicine, St. Louis, MO, 63110, USA

33 <sup>12</sup>Department of Pediatrics, Vanderbilt University Medical Center, Nashville, TN, 37232,  
34 USA

35

36 **Contact information:**

37 **James E. Crowe, Jr., M.D. [LEAD CONTACT]**

38 Departments of Pediatrics, Pathology, Microbiology, and Immunology, and the  
39 Vanderbilt Vaccine Center

40 **Mail:**

41 Vanderbilt Vaccine Center

42 11475 Medical Research Building IV

43 2213 Garland Avenue

44 Nashville, TN 37232-0417, USA

45 **Telephone** (615) 343-8064

46 **Email** james.crowe@vumc.org

47 **Additional Title Page Footnotes**

48 \* These authors contributed equally

49 \*\*Corresponding authors

50

51

52 **Keywords:** Coronavirus; SARS-CoV-2; SARS-CoV; COVID-19; Antibodies, Monoclonal;

53 Human; Adaptive Immunity.

54 **Antibodies are a principal determinant of immunity for most RNA viruses and have**  
55 **promise to reduce infection or disease during major epidemics. The novel**  
56 **coronavirus SARS-CoV-2 has caused a global pandemic with millions of infections**  
57 **and hundreds of thousands of deaths to date<sup>1,2</sup>. In response, we used a rapid**  
58 **antibody discovery platform to isolate hundreds of human monoclonal antibodies**  
59 **(mAbs) against the SARS-CoV-2 spike (S) protein. We stratify these mAbs into five**  
60 **major classes based on their reactivity to subdomains of S protein as well as their**  
61 **cross-reactivity to SARS-CoV. Many of these mAbs inhibit infection of authentic**  
62 **SARS-CoV-2 virus, with most neutralizing mAbs recognizing the receptor-binding**  
63 **domain (RBD) of S. This work defines sites of vulnerability on SARS-CoV-2 S and**  
64 **demonstrates the speed and robustness of new antibody discovery methodologies.**

65  
66 Human mAbs to the viral surface spike (S) glycoprotein mediate immunity to other  
67 betacoronaviruses including SARS-CoV<sup>3-7</sup> and Middle East respiratory syndrome  
68 (MERS)<sup>8-17</sup>. Because of this, we and others have hypothesized that human mAbs may  
69 have promise for use in prophylaxis, post-exposure prophylaxis, or treatment of SARS-  
70 CoV-2 infection<sup>18</sup>. MAbs can neutralize betacoronaviruses by several mechanisms  
71 including blocking of attachment of the S protein RBD to a receptor on host cells (which  
72 for SARS-CoV and SARS-CoV-2<sup>1</sup> is angiotensin-converting enzyme 2 [ACE2])<sup>12</sup>. We  
73 hypothesized that the SARS-CoV-2 S protein would induce diverse human neutralizing  
74 antibodies following natural infection. While antibody discovery usually takes months  
75 to years, there is an urgent need to both characterize the human immune response to  
76 SARS-CoV-2 infection and to develop potential medical countermeasures. Using Zika  
77 virus as a simulated pandemic pathogen and leveraging recent technological advances  
78 in synthetic genomics and single-cell sequencing, we recently isolated hundreds of

79 human mAbs from a single B cell suspension and tested them *in vitro* for neutralization  
80 and for protection in small animals and nonhuman primates, all within 78 days<sup>19</sup>. Using  
81 similar methodologies and further efficiency improvements, we sought to obtain  
82 human mAbs rapidly for SARS-CoV-2 from the B cells of some of the first human  
83 subjects identified with infection in North America. We used an approach similar to  
84 that in our previous technical demonstration with Zika, however, for the SARS-CoV-2  
85 discovery effort we report here we used several different workflows in parallel (**Figure**  
86 **1, Table S2**), which we completed in an expedited time frame (**Figure 1**).

87  
88 We first developed or obtained antigens and recombinant proteins necessary for  
89 identifying and isolating antigen-reactive B cells. We synthesized a cDNA encoding a  
90 stabilized trimeric prefusion ectodomain of S protein (S2P<sub>ecto</sub>)<sup>20</sup>, expressed the protein in  
91 293F cells, and verified the presence of the prefusion conformation by electron  
92 microscopy (**Figure S1**). We also synthesized and expressed the S protein receptor  
93 binding domain (S<sub>RBD</sub>) and obtained recombinant S protein N terminal domain (S<sub>NTD</sub>)  
94 that had been prepared by other academic or commercial sources. Using these tools, we  
95 designed a mAb discovery approach focused on identifying naturally occurring human  
96 mAbs specific for S.

97  
98 We obtained blood samples from four subjects infected in China who were among the  
99 earliest identified SARS-CoV-2-infected patients in North America (**Table S1**). These  
100 subjects had a history of recent laboratory-confirmed SARS-CoV-2 infection acquired in  
101 Wuhan or Beijing, China. The samples were obtained 35 days (subject 1; the case  
102 identified in the U.S.<sup>21</sup>), 36 days (subject 2), or 50 days (subjects 3 and 4) after the onset  
103 of symptoms. We tested plasma or serum specimens from the four subjects infected

104 with SARS-CoV-2, or from a healthy donor (subject 5) as control. Serum/plasma  
105 antibody ELISA binding assays using S2P<sub>ecto</sub>, S<sub>RBD</sub>, or S<sub>NTD</sub> protein from SARS-CoV-2 or  
106 S2P<sub>ecto</sub> protein from SARS-CoV revealed that the previously infected subjects had  
107 circulating antibodies that recognized each of the proteins tested, with highest reactivity  
108 against SARS-CoV-2 S2P<sub>ecto</sub> and S<sub>RBD</sub> proteins (**Figure 2a**). Each of the immune subjects  
109 also had circulating antibodies that bound to SARS-CoV S2P<sub>ecto</sub>. The healthy donor  
110 serum antibodies did not react with any of the antigens. B cells were enriched from  
111 PBMCs by negative selection using antibody-coated magnetic beads and stained with  
112 phenotyping antibodies specific for CD19, IgD, and IgM. Analytical flow cytometry was  
113 performed to assess the frequency of antigen-specific memory B cells for each donor.  
114 We identified class-switched memory B cells by gating for an IgD<sup>-</sup>/IgM<sup>-</sup>/CD19<sup>+</sup>  
115 population (**Figure 2b**). From this memory B cell population, we identified antigen-  
116 reactive cells using biotinylated recombinant S2P<sub>ecto</sub> protein or biotinylated RBD fused  
117 to mouse Fc (RBD-mFc). Subjects 1 and 2 had very low frequencies of antigen-specific  
118 memory B cells that were not greater than two-fold above the background staining  
119 frequency in a non-immune sample (subject 6) (**Figure 2c**). In contrast to subjects 1 and  
120 2, subjects 3 and 4 were 2 weeks later in convalescence and exhibited 0.62 or 1.22 % of  
121 class-switched B cells that reacted with antigen (**Figure 2c**). Subjects 3 and 4 also  
122 exhibited high titers in a serum antibody focus reduction neutralization test (FRNT)  
123 with an authentic SARS-CoV-2 strain (WA/1/2020) (**Figure 2d**). Therefore, we focused  
124 subsequent efforts on sorting B cells from the specimens of subjects 3 and 4, which were  
125 pooled for efficiency. The pooled memory B cell suspension had frequencies for S2P<sub>ecto</sub>  
126 or RBD-mFc that were 0.81 or 0.19% of the IgD<sup>-</sup>/IgM<sup>-</sup>/CD19<sup>+</sup> population, respectively  
127 (**Figure 2e**). The bulk sorted S2P<sub>ecto</sub>- or RBD-mFc-specific B cells were stimulated on a  
128 feeder layer with CD40L, IL-21 and BAFF<sup>22</sup>, and the secreted antibodies in the resulting

129 cell culture supernatants exhibited neutralizing activity against the WA1/2020 strain  
130 (**Figure 2f**). After 7 days in culture, these activated B cells were removed from the  
131 feeder layers. Roughly half of these B cells were single-cell sequenced and antibody  
132 genes were synthesized as previously described<sup>19</sup>. The remaining cells were loaded onto  
133 a Berkeley Lights Beacon optofluidic instrument in a novel plasma cell survival  
134 medium, and antigen reactivity of secreted antibody from individual B cells was  
135 measured for thousands of cells (**Figure S2**). Antigen-reactive B cells were exported  
136 from the instrument and the heavy and light chain genes from single B cells were  
137 sequenced and cloned into immunoglobulin expression vectors.

138  
139 Using the parallel workflows, we isolated 386 recombinant SARS-CoV-2-reactive  
140 human mAbs that expressed sufficiently well as recombinant IgG to characterize the  
141 activity of the mAb. The recombinant mAbs were tested for binding in ELISA to  
142 recombinant monomeric  $S_{\text{RBD}}$  or  $S_{\text{NTD}}$  of SARS-CoV-2 or trimeric  $S2P_{\text{ecto}}$  proteins of  
143 SARS-CoV-2 or SARS-CoV (**Figure 3a**) and in a cell-impedance based SARS-CoV-2  
144 neutralization assay with WA1/2020 strain SARS-CoV-2 in Vero-furin cells (**Figure S3**).  
145 The ELISA and neutralization screening assays revealed that the antibodies could be  
146 grouped into five binding patterns based on domain recognition and cross-reactivity  
147 (**Figure 3b**). Comparison of binding patterns with full or partial neutralizing activity in  
148 a rapid cell-impedance-based SARS-CoV-2 neutralization test (**Figure 3c**) showed  
149 clearly that most of the neutralizing antibodies mapped to the RBD, revealing the RBD  
150 as the principal site of vulnerability for SARS-CoV-2 neutralization in these subjects. We  
151 examined the sequences for the 386 antibodies to assess the diversity of antigen-specific  
152 B cell clonotypes discovered. The analysis showed that among the 386 mAbs, 324  
153 unique amino sequences were present and 311 unique  $V_{\text{H}}\text{-}J_{\text{H}}\text{-}CDRH3\text{-}V_{\text{L}}\text{-}J_{\text{L}}\text{-}CDRL3$

154 clonotypes were represented, with diverse usage of antibody variable genes (**Figure 3d**).  
155 The CDR3 amino acid length distributions in the heavy and light chains were typical of  
156 human repertoires (**Figure 3e**)<sup>23</sup>. The high relatedness of sequences to the inferred  
157 unmutated ancestor antibody genes observed for this panel of antibodies (**Figure 3f**)  
158 contrasts with the much higher frequencies seen in B cell recall responses against  
159 common human pathogens like influenza<sup>24</sup>. These data suggest that the SARS-CoV-2  
160 antibodies likely were induced during the primary response to SARS-CoV-2 infection  
161 and not by a recall response to a distantly related seasonal coronavirus. To validate the  
162 neutralizing activity measured in the cell-impedance-based neutralization test, we also  
163 confirmed neutralization for representative mAbs in a quantitative FRNT assay for  
164 SARS-CoV-2 (**Figure 3g**) or a neutralization assay with a SARS-CoV luciferase reporter  
165 virus (**Figure 3h**). Together, these results confirmed that mAbs recognizing multiple  
166 epitopes on S were able to neutralize SARS-CoV-2 and cross-react with SARS-CoV, with  
167 most neutralizing mAbs specific for the RBD of S.

168  
169 Here, we coupled single-B-cell RNAseq methods with high-throughput IgG micro-  
170 expression and real-time neutralization assays to isolate and profile a large number of  
171 neutralizing antibodies in a period of only weeks after sample acquisition. As we show,  
172 recent advances in single-cell sequencing and gene synthesis have enabled antibody  
173 discovery at unprecedented scale and speed. In our particular example, sequences of  
174 confirmed neutralizing antibodies were transferred to downstream manufacturing  
175 partners only 18 days after antigen-specific cell sorting. However, given the need for  
176 affinity maturation and the development of a mature B cell response there are limits on  
177 the timeline from infection to isolation of potent neutralizing antibodies with  
178 therapeutic promise. It has been previously shown for Ebola virus infection that



179 potentially neutralizing antibodies are not easily isolated from memory B cells until later  
180 timepoints in the first year after infection<sup>25,26</sup>. It is likely that our success in isolating  
181 neutralizing antibodies from subjects 3 and 4 here at 50 days after onset, but not from  
182 subjects 1 and 2 at 35 or 36 days after onset, reflected additional maturation of the  
183 memory B cell response that occurred in the additional two weeks convalescence.  
184 Overall, our work illustrates the promise of coupling recent technological advances for  
185 antibody discovery and defines the RBD of SARS-CoV-2 S as a major site of  
186 vulnerability for vaccine design and therapeutic antibody development. The most  
187 potent neutralizing human mAbs isolated here also could serve as candidate biologics  
188 to prevent or treat SARS-CoV-2 infection.

189  
190 **Acknowledgements.** We thank Merissa Mayo and Norma Suazo Galeano for coordination of  
191 human subjects studies, David O'Connor, Nasia Safdar, Geoff Baird, Jay Shendure and  
192 Samira Mubareka for helpful advice on human subjects, Angela Jones and the staff of the  
193 Vanderbilt VANTAGE core laboratory for expedited sequencing, Ross Trosseth for assistance  
194 with data management and analysis, Robin Bombardi and Cinque Soto for technical  
195 consultation on genomics approaches, Arthur Kim for production of a recombinant form of  
196 the mAb CR3022, Chris Swearingen and the staff of Fedex Express Specialty Services for  
197 expedited transport services, Vincent Pai and Keith Breinlinger of Berkeley Lights, Inc., and  
198 Kevin Louder and scientists at Twist Bioscience, Brian Fritz at 10x Genomics, and  
199 representatives at ACEA Biosciences for providing resources, outstanding expedited services  
200 and expert applications support. We thank Andrew Ward, Sandhya Bangaru and Nicole-  
201 Kallewaard-Lelay for protein reagents. This study was supported by Defense Advanced  
202 Research Projects Agency (DARPA) grant HR0011-18-2-0001, NIH contracts 75N93019C00074  
203 and 75N93019C00062 and the Dolly Parton COVID-19 Research Fund at Vanderbilt. This

204 work was supported by NIH grant 1S10RR028106-01A1 for the Next Generation Nucleic Acid  
205 Sequencer, housed in Vanderbilt Technologies for Advanced Genomics (VANTAGE) and  
206 supported by the National Center for Research Resources, Grant UL1 RR024975-01, and is  
207 now at the National Center for Advancing Translational Sciences, Grant 2 UL1 TR000445-06.  
208 S.J.Z. was supported by NIH T32 AI095202. J.B.C. is supported by a Helen Hay Whitney  
209 Foundation postdoctoral fellowship D.R.M. was supported by NIH T32 AI007151 and a  
210 Burroughs Wellcome Fund Postdoctoral Enrichment Program Award. J.E.C. is the recipient of  
211 the 2019 Future Insight Prize from Merck KGaA, Darmstadt Germany, which supported this  
212 research with a research grant. The content is solely the responsibility of the authors and does  
213 not necessarily represent the official views of the U.S. government or the other sponsors.

214

215 **Author contributions.** Conceived of the project: S.J.Z., P.G., R.H.C., L.B.T., M.S.D.,  
216 J.E.C.; Obtained funding: J.E.C. and M.S.D. Obtained human samples: M.O., H.Y.C.,  
217 J.E.C.; Performed laboratory experiments: S.J.Z., P.G., R.E.C., J.X.R., A.T., R.S.N., R.E.S.,  
218 N.S., E.B., J.E.D., K.W.M., S.S., D.R.M; Performed computational work: E.C.C., T.J., S.D.,  
219 L.M.; Supervised research: M.S.D., L.B.T., R.S.B., R.H.C., J.E.C. Provided critical  
220 reagents: J.E.D., K.W.M., F.E.-H.L., D.C.N., I.S., R.S.B. Wrote the first draft of the paper:  
221 S.J.Z., P.G., R.H.C., J.E.C.; All authors reviewed and approved the final manuscript.

222

223 **Competing interests.** R.S.B. has served as a consultant for Takeda and Sanofi Pasteur on  
224 issues related to vaccines. M.S.D. is a consultant for Inbios, Vir Biotechnology, NGM  
225 Biopharmaceuticals, Eli Lilly, and on the Scientific Advisory Board of Moderna, and a recipient  
226 of unrelated research grants from Moderna and Emergent BioSolutions. H.Y.C. has served as  
227 a consultant for Merck and GlaxoSmithKline, research funding from Sanofi Pasteur and  
228 research support from Cepheid, Genentech, and Ellume. J.E.C. has served as a consultant for

229 Sanofi and is on the Scientific Advisory Boards of CompuVax and Meissa Vaccines, is a  
230 recipient of previous unrelated research grants from Moderna and Sanofi and is Founder of  
231 IDBiologics, Inc. Vanderbilt University has applied for patents concerning SARS-CoV-2  
232 antibodies that are related to this work. Emory University has applied for a patent concerning  
233 the plasmablast survival medium. J.E.D. and K.W.M. are employees of Berkeley Lights, Inc.  
234 All other authors declared no competing interests.

235

236 **Data availability.** All relevant data are included with the manuscript.

237 **Figure Legends**

238

239

240 **Figure 1. Workflows and timelines.**

241 **a. Overview of rapid monoclonal antibody discovery workflows.** The overall scheme

242 is shown, representing the seven specific workflows conducted in parallel (specified in

243 **Table S2**). Blood was collected and white blood cells separated, B cells were enriched

244 from PBMCs by negative selection using paramagnetic beads, antigen-specific cells

245 were obtained by flow cytometric sorting, then processed for direct B cell selection and

246 sequencing or *in vitro* expansion/activation. Cultured B cells were loaded on a Beacon

247 instrument (Berkeley Lights) for functional screening (**Figure S2, Movie S1**) or in a

248 Chromium device (10X Genomics) followed by RT-PCR, sequence analysis, cDNA gene

249 synthesis and cloning into an expression vector, and microscale IgG expression in CHO

250 cells by transient transfection. Recombinant IgG was tested by ELISA for binding to

251 determine antigen reactivity and by a cell impedance-based neutralization test

252 (xCelligence; ACEA) (**Figure S3**) with live virus in a BSL3 laboratory for functional

253 characterization.

254

255 **Figure 2. Characterization of SARS-CoV-2 immune donor samples.**

256 **a. Serum or plasma antibody reactivity** for the four SARS-CoV-2 immune subjects or

257 one non-immune control, in ELISA using SARS-CoV-2 S2P<sub>ecto</sub>, S<sub>RBD</sub>, S<sub>NTD</sub>, SARS-CoV

258 S2P<sub>ecto</sub> or PBS.

259 **b. Gating for memory B cells** in total B cells enriched by negative selection using

260 magnetic beads for subject 4; Cells were stained with anti-CD19 antibody conjugated to

261 allophycocyanin (APC) and anti-IgM and anti-IgD antibodies conjugated to fluorescein

262 isothiocyanate (FITC).

263 **c. Analytical flow cytometric analysis of B cells** for subjects 1 to 4, compared to a  
264 healthy subject (subject 6). Plots show CD19<sup>+</sup>IgD<sup>-</sup>IgM<sup>-</sup> population using gating strategy  
265 as in **b**. Cells labeled with biotinylated S2P<sub>ecto</sub> or RBD-mFc antigens were detected using  
266 phycoerythrin (PE)-conjugated streptavidin.

267 **d. Plasma or serum neutralizing activity** against the WA1/2020 strain SARS-CoV-2 for  
268 subjects 1 to 4 or a healthy donor (subject 6). % neutralization is reported.

269 **e. FACS isolation of S2P<sub>ecto</sub> or RBD-mFc-reactive B cells** from pooled B cells of subject 3  
270 and 4. Plots show CD19<sup>+</sup>IgD<sup>-</sup>IgM<sup>-</sup> population using gating strategy as in **b**, and antigen-  
271 reactive B cells were identified as in **c**.

272 **f. Lymphoblastoid cell line (LCL) supernatant neutralization.** Neutralization of the  
273 WA1/2020 strain SARS-CoV-2 by supernatant collected from cell cultures of S2P<sub>ecto</sub>- or  
274 RBD-mFc-sorted memory B cells that had been stimulated in bulk *in vitro* on feeder  
275 layers expressing CD40L and secreting IL-21 and BAFF. The supernatants were tested  
276 in a ten-point dilution series in the FRNT, and % neutralization is reported. Values  
277 shown are the mean ± SD of technical duplicates.

278

279 **Figure 3. Reactivity and functional activity of 386 human mAbs.**

280 **a. Structures of SARS-CoV-2 spike antigen.** Top panel: S protein monomer of SARS-  
281 CoV-2 highlighting RBD (blue) and NTD (red) subdomains that were expressed as  
282 recombinant proteins. The ACE2 binding site on RBD is shown in orange. Known  
283 glycans are shown as light grey spheres. (PDB 6VYB) Middle panel: the structure of  
284 trimeric SARS-CoV-2 spike with one RBD in the “head up” conformation. Bottom panel:  
285 structure (PDB 6M0J) of SARS-CoV-2 RBD (blue) and ACE2 (pink) highlighting  
286 differences between RBDs of SARS-CoV-2 and SARS-CoV (cyan).

287 **b. MAbs binding to each of four S proteins or subdomains.** The figure shows a  
288 heatmap for binding of 386 mAbs expressed recombinantly, representing optical  
289 density (O.D.) values collected at 450 nm for each antigen (range 0.035 to 4.5). White  
290 indicates lack of detectable binding, while blue indicates binding, with darker blue  
291 indicating higher O.D. values.

292 **c. Screening test for neutralizing activity.** Each mAb was tested in a cell-impedance  
293 based neutralization test (**Figure S3**) using Vero-furin cells and live WA1/2020 strain  
294 SARS-CoV-2 in a BSL3 laboratory. Green indicates full protection of cells (full  
295 neutralization), purple indicates partial protection of cells, (partial neutralization), and  
296 white indicates neutralizing activity was not detected. Based on both binding and  
297 neutralization, we grouped the mAbs into classes. Class I mAbs bind to both S2P<sub>ecto</sub> and  
298 S<sub>RBD</sub> proteins and are SARS-CoV-2 specific; Class II mAbs also bind to both S2P<sub>ecto</sub> and  
299 S<sub>RBD</sub> proteins and cross-react with SARS-CoV; Class III mAbs bind to both S2P<sub>ecto</sub> and  
300 S<sub>NTD</sub> proteins and are mostly SARS-CoV-2 specific; Class IV mAbs bind only to S2P<sub>ecto</sub>  
301 protein and are SARS-CoV-2 specific; Class V mAbs bind only to S2P<sub>ecto</sub> protein and  
302 cross-react with SARS-CoV.

303 **d. Heatmap showing usage of antibody variable gene segments for variable (V) and**  
304 **joining (J) genes.** Of the 386 antibodies tested in (b) and (c) above, 324 were found to  
305 have unique sequences, and those unique sequences were analyzed for genetic features.  
306 The frequency counts are derived from the total number of unique sequences with the  
307 corresponding V and J genes. The V/J frequency counts then were transformed into a z-  
308 score by first subtracting the average frequency, then normalizing by the standard  
309 deviation of each subject. Red denotes more common gene usage, while blue denotes  
310 less common gene usage.

311 **e. CDR3 amino acid length distribution.** The CDR3 of each sequence was determined  
312 using PyIR software. The amino acid length of each CDR3 was counted. The  
313 distribution of CDR3 amino acid lengths for heavy or light chains then was plotted as a  
314 histogram and fitted using kernel density estimation for the curves.

315 **f. Divergence from inferred germline gene sequences.** The number of mutations from  
316 each inferred unmutated ancestor sequence in the region spanning from antibody  
317 framework region 1 to 4 was counted up for each chain. These numbers then were  
318 transformed into percent values and plotted as violin plots.

319 **g. Quantitative test for neutralizing activity against SARS-CoV-2 using FRNT.**

320 Representative mAbs that exhibited full neutralizing activity in the screening  
321 neutralization test in (c) above using micro-scale expression were prepared in midi-  
322 scale as purified IgG and tested in a serial dilution series in the FRNT with live  
323 WA1/2020 strain SARS-CoV-2 to demonstrate neutralizing potency of class-  
324 representative mAbs. % neutralization of virus infection (relative to control wells with  
325 no mAb) at each dilution is shown. Values shown are the mean of two technical  
326 replicates, and error bars denote the standard deviation for each point.

327 **h. Quantitative test for neutralizing activity against SARS-CoV using a nano-**

328 **luciferase virus.** A representative purified mAb that exhibited cross-reactive binding to  
329 SARS-CoV S2P<sub>ecto</sub> protein in (b) above and that also exhibited full neutralizing activity  
330 in the screening neutralization test in (c) above was tested in a serial dilution series in a  
331 neutralization test with a recombinant, reverse-genetics-derived SARS-CoV encoding a  
332 nano-luciferase reporter gene, and reduction of luciferase activity was used to calculate  
333 % neutralization. Values shown are the mean of two technical replicates, and error bars  
334 denote the standard deviation for each point.

335

336 **Supplementary Information**

337

338

339 **Figure S1. Expression and validation of prefusion-stabilized SARS-CoV-2 S2P<sub>ecto</sub>**

340 **protein.**

341 **a.** Reducing SDS-PAGE gel indicating S2P<sub>ecto</sub> protein migrating at approximately

342 180KDa.

343 **b. Representative micrograph of negative-stain electron microscopy with S2P<sub>ecto</sub>**

344 **protein preparation.** Scale bar denotes 100 nm.

345 **c. 2D class-averages of S2P<sub>ecto</sub> protein in the prefusion conformation.** The size for each

346 box is 128 pixels.

347

348 **Figure S2. Functional assays from single antigen-reactive B cells.**

349 **a. Schematic of detection of antigen-specific antibody.** Biotinylated antigen (dark  
350 grey) was coupled to a streptavidin-conjugated polystyrene bead (light grey).

351 Antibodies (blue) are secreted by single B cells loaded into individual NanoPens on the  
352 Berkeley Lights Beacon optofluidic device. Antibody binding to antigen was detected  
353 with a fluorescent anti-human IgG secondary Ab (black).

354 **b. Left:** Schematic of fluorescing beads in the channel above a pen containing an  
355 individual B cell indicates antigen-specific reactivity.

356 **Top right:** False-color still image of positive wells with B cells secreting S2P<sub>ecto</sub>-  
357 reactive antibodies. Reactive antibody diffusing out of a pen is visualized as a plume of  
358 fluorescence.

359 **Bottom right:** False-color still image of positive wells with B cells secreting RBD-  
360 mFc-reactive antibodies. **c.** Representative images of RBD-mFc reactive clones.

361

362 **Figure S3. Real-time cell analysis assay to screen for neutralization activity.**



363 **a. Representative sensograms for neutralizing mAbs.** Curves for fully neutralizing mAb  
364 (green) and partially neutralizing mAb (red) by monitoring of CPE in Vero-furin cells that  
365 were inoculated with SARS-CoV-2 and pre-incubated with the respective mAb. Uninfected  
366 cells (blue) and infected cells without antibody addition (grey) served as controls for intact  
367 monolayer and full CPE, respectively. Data represented single well measurement for each  
368 mAb and mean SD values of technical duplicates or quadruplicates for the controls.

369 **b. Example sensograms from individual wells of 384-well E-plate analysis showing rapid**  
370 **identification of SARS-CoV-2 neutralizing mAbs.** Neutralization was assessed using  
371 micro-scale purified mAbs and each mAb was tested in four 5-fold dilutions as indicated.  
372 Plates were measured every 8-12 hours for a total of 72 hrs as in (a).

373

374

375 **Movie S1. Time-lapse imaging of antigen-sorted single B cells secreting S2P<sub>ecto</sub>-**

376 **reactive antibodies.** A field of view of the optofluidic chip is shown with single B cells  
377 at the bottom of NanoPens, as in Figure S1. Antigen-reactive antibody bound to S2P<sub>ecto</sub>  
378 antigen conjugated to streptavidin polystyrene beads loaded into the channel is  
379 detected by an anti-IgG secondary antibody. Positive wells are identified by the specific  
380 bloom of fluorescence signal, indicating antigen-specific antibody diffusing out of a  
381 single pen. The edges of pens are highlighted in green and pen numbers are shown in  
382 yellow. For that field of view, there were 96 pens containing B cells, with 53 cells  
383 secreting trimer-reactive antibody and 30 cells secreting antibody reactive to RBD. The  
384 movie is composed of still images obtained every five minutes over the course of a 30-  
385 minute assay.

386 **References**

387

388 1. Zhou, P., *et al.* A pneumonia outbreak associated with a new coronavirus of  
389 probable bat origin. *Nature* **579**, 270-273 (2020).

390

391 2. Zhu, N., *et al.* A novel coronavirus from patients with pneumonia in China, 2019.  
392 *N Engl J Med* **382**, 727-733 (2020).

393

394 3. Sui, J., *et al.* Potent neutralization of severe acute respiratory syndrome (SARS)  
395 coronavirus by a human mAb to S1 protein that blocks receptor association. *Proc*  
396 *Natl Acad Sci U S A* **101**, 2536-2541 (2004).

397

398 4. ter Meulen, J., *et al.* Human monoclonal antibody as prophylaxis for SARS  
399 coronavirus infection in ferrets. *Lancet* **363**, 2139-2141 (2004).

400

401 5. ter Meulen, J., *et al.* Human monoclonal antibody combination against SARS  
402 coronavirus: synergy and coverage of escape mutants. *PLoS Med* **3**, e237 (2006).

403

404 6. Zhu, Z., *et al.* Potent cross-reactive neutralization of SARS coronavirus isolates by  
405 human monoclonal antibodies. *Proc Natl Acad Sci U S A* **104**, 12123-12128 (2007).

406

407 7. Rockx, B., *et al.* Structural basis for potent cross-neutralizing human monoclonal  
408 antibody protection against lethal human and zoonotic severe acute respiratory  
409 syndrome coronavirus challenge. *J Virol* **82**, 3220-3235 (2008).

410

- 411 8. Chen, Z., *et al.* Human neutralizing monoclonal antibody inhibition of Middle East  
412 respiratory syndrome coronavirus replication in the common marmoset. *J Infect*  
413 *Dis* **215**, 1807-1815 (2017).  
414
- 415 9. Choi, J.H., *et al.* Characterization of a human monoclonal antibody generated from  
416 a B-cell specific for a prefusion-stabilized spike protein of Middle East respiratory  
417 syndrome coronavirus. *PLoS One* **15**, e0232757 (2020).  
418
- 419 10. Niu, P., *et al.* Ultrapotent human neutralizing antibody repertoires against Middle  
420 East respiratory syndrome coronavirus from a recovered patient. *J Infect Dis* **218**,  
421 1249-1260 (2018).  
422
- 423 11. Wang, L., *et al.* Importance of neutralizing monoclonal antibodies targeting  
424 multiple antigenic sites on the Middle East respiratory syndrome coronavirus  
425 spike glycoprotein to avoid neutralization escape. *J Virol* **92**(2018).  
426
- 427 12. Wang, N., *et al.* Structural Definition of a Neutralization-Sensitive Epitope on the  
428 MERS-CoV S1-NTD. *Cell Rep* **28**, 3395-3405 e3396 (2019).  
429
- 430 13. Zhang, S., *et al.* Structural definition of a unique neutralization epitope on the  
431 receptor-binding domain of MERS-CoV spike glycoprotein. *Cell Rep* **24**, 441-452  
432 (2018).  
433

- 434 14. Corti, D., *et al.* Prophylactic and postexposure efficacy of a potent human  
435 monoclonal antibody against MERS coronavirus. *Proc Natl Acad Sci U S A* **112**,  
436 10473-10478 (2015).  
437
- 438 15. Jiang, L., *et al.* Potent neutralization of MERS-CoV by human neutralizing  
439 monoclonal antibodies to the viral spike glycoprotein. *Sci Transl Med* **6**, 234ra259  
440 (2014).  
441
- 442 16. Tang, X.C., *et al.* Identification of human neutralizing antibodies against MERS-  
443 CoV and their role in virus adaptive evolution. *Proc Natl Acad Sci U S A* **111**, E2018-  
444 2026 (2014).  
445
- 446 17. Ying, T., *et al.* Exceptionally potent neutralization of Middle East respiratory  
447 syndrome coronavirus by human monoclonal antibodies. *J Virol* **88**, 7796-7805  
448 (2014).  
449
- 450 18. Jiang, S., Hillyer, C. & Du, L. Neutralizing antibodies against SARS-CoV-2 and  
451 other human coronaviruses. *Trends Immunol* **41**, 355-359 (2020).  
452
- 453 19. Gilchuk P, B.R., Erasmus JH, Durnel LA, Nargi R, Soto C, Abbink P, Suscovich TJ,  
454 Tan Q, Khandhar A, Archer J, Bryan A, Davidson E, Doranz BJ, Fouch ME, Jones  
455 T, Larson E, Ertel S, Granger B, Fuerte-Stone J, Roy V, Broge T, Linnekin TC, Linde  
456 CH, Gorman MJ, Nkolola J, Galit Alter G, Steven G Reed SG, Daniel H Barouch  
457 DH, Michael S Diamond MS, Crowe JE Jr, Neal Hoeven N, Thackray L, Carnahan

- 458 R. Integrated technology platform for accelerated discovery of antiviral antibody  
459 therapeutics. . *Nature Medicine* (2020).  
460
- 461 20. Wrapp, D., *et al.* Cryo-EM structure of the 2019-nCoV spike in the prefusion  
462 conformation. *Science* **367**, 1260-1263 (2020).  
463
- 464 21. Holshue, M.L., *et al.* First case of 2019 novel coronavirus in the United States. *N*  
465 *Engl J Med* **382**, 929-936 (2020).  
466
- 467 22. Gilchuk, P., *et al.* Analysis of a Therapeutic antibody cocktail reveals determinants  
468 for cooperative and broad ebolavirus neutralization. *Immunity* **52**, 388-403 e312  
469 (2020).  
470
- 471 23. Soto, C., *et al.* High frequency of shared clonotypes in human B cell receptor  
472 repertoires. *Nature* **566**, 398-402 (2019).  
473
- 474 24. Wrammert, J., *et al.* Broadly cross-reactive antibodies dominate the human B cell  
475 response against 2009 pandemic H1N1 influenza virus infection. *J Exp Med* **208**,  
476 181-193 (2011).  
477
- 478 25. Williamson, L.E., *et al.* Early human B cell Rrsponse to Ebola virus in four U.S.  
479 survivors of infection. *J Virol* **93**(2019).  
480
- 481 26. Davis, C.W., *et al.* Longitudinal analysis of the human B cell response to Ebola  
482 virus infection. *Cell* **177**, 1566-1582 e1517 (2019).



**Discovery approach #1:  
single-cell sequencing  
gene synthesis**

**Discovery approach #2:  
single-cell functional assays  
sequencing and cloning**

Sorting  
(Day 1)

Sorting  
(Day 1)

Blood collection  
PBMC isolation

B cell enrichment

Antigen-specific sorting

Sequencing  
(Day 1-3)

Sequencing  
(Day 8-9)

Expansion  
(Days 1-8)

Single-cell sequencing  
Bioinformatic analysis

in vitro expansion

Synthesis  
(Day 10-28)

Single-cell  
assays  
(Day 9)

Gene synthesis

Single-cell antibody secretion assays  
Sequencing and cloning

Expression  
(Day 28-32)

Sequencing,  
cloning  
(Days 9-13)

IgG  
expression  
vector

Transient transfection

CHO  
cells

Expression  
(Day 14-17)

Microscale expression

Neutralization  
(Day 35)

Neutralization  
(Day 18)

**310  
reactive  
mAbs**

Antigen reactivity

**76  
reactive  
mAbs**

Functional characterization

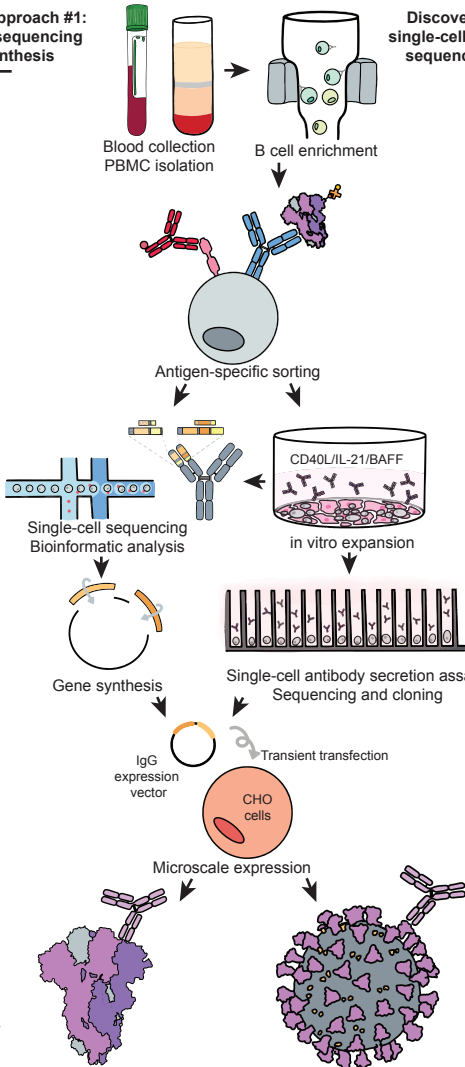

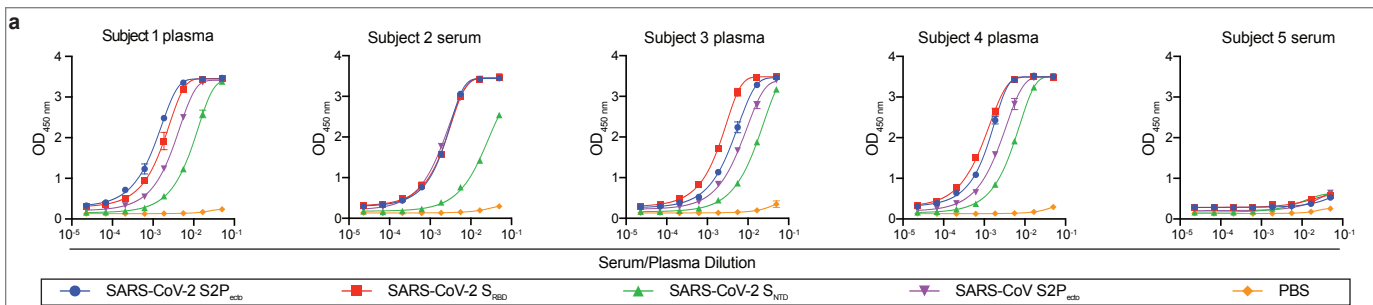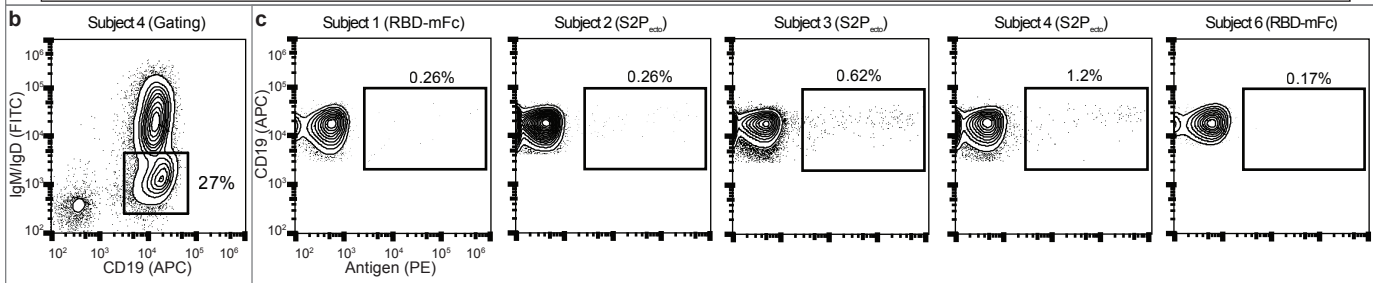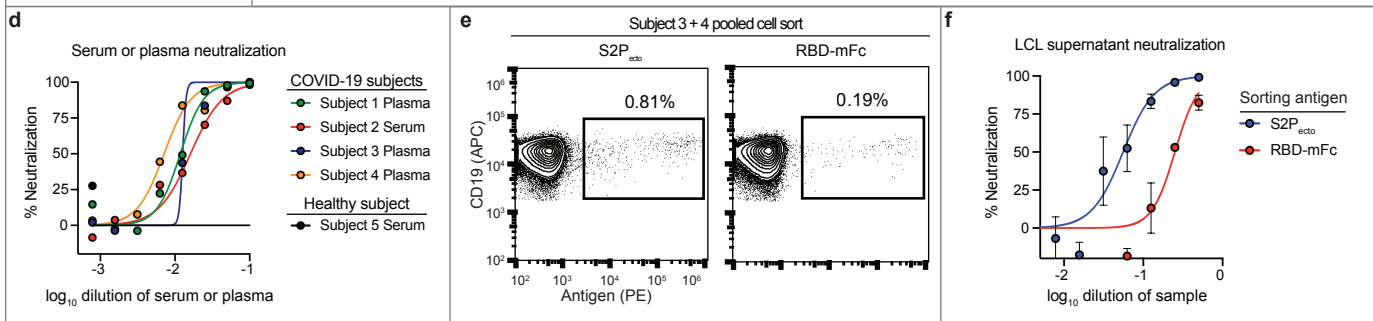



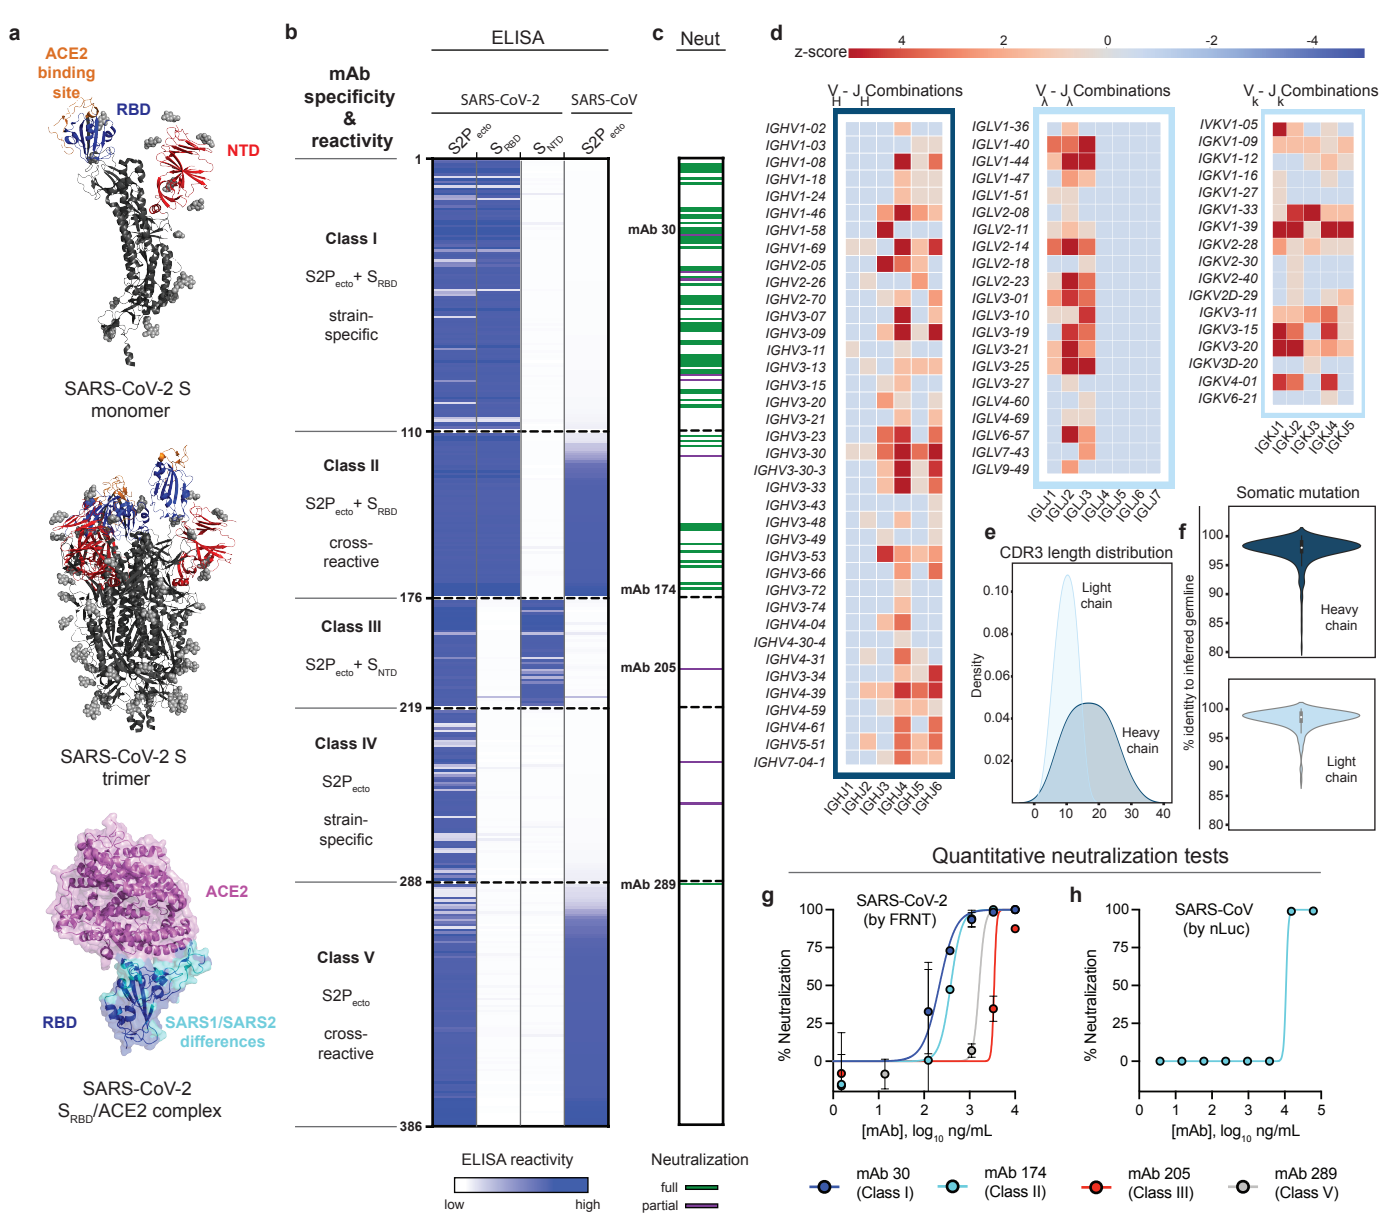

## Figure S1

**a**

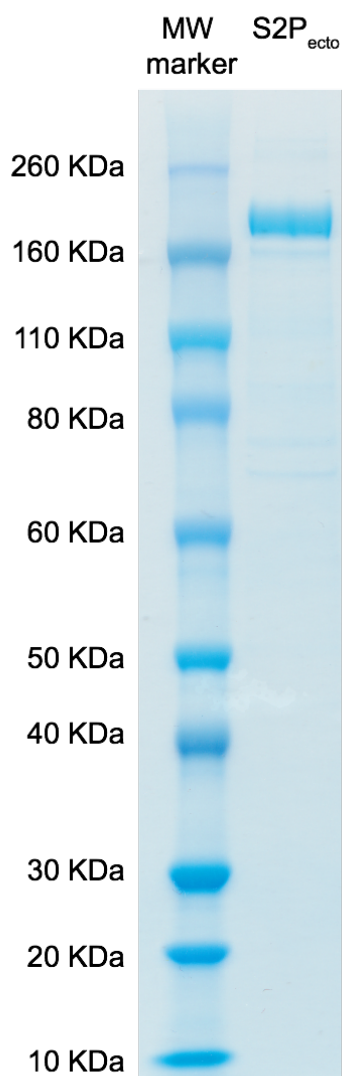

**b**

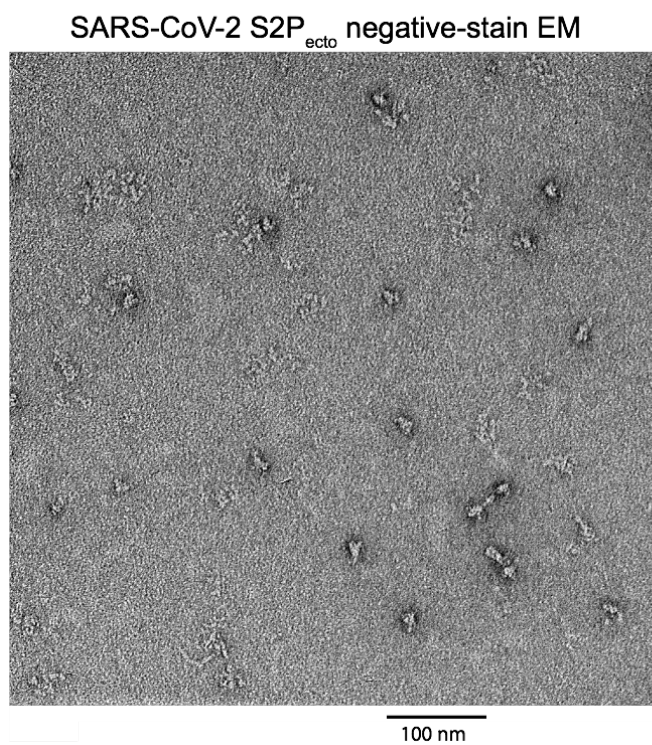

**c**

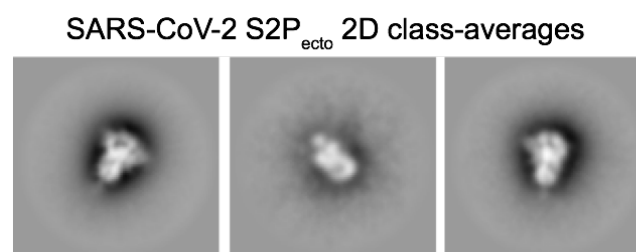

## Figure S2

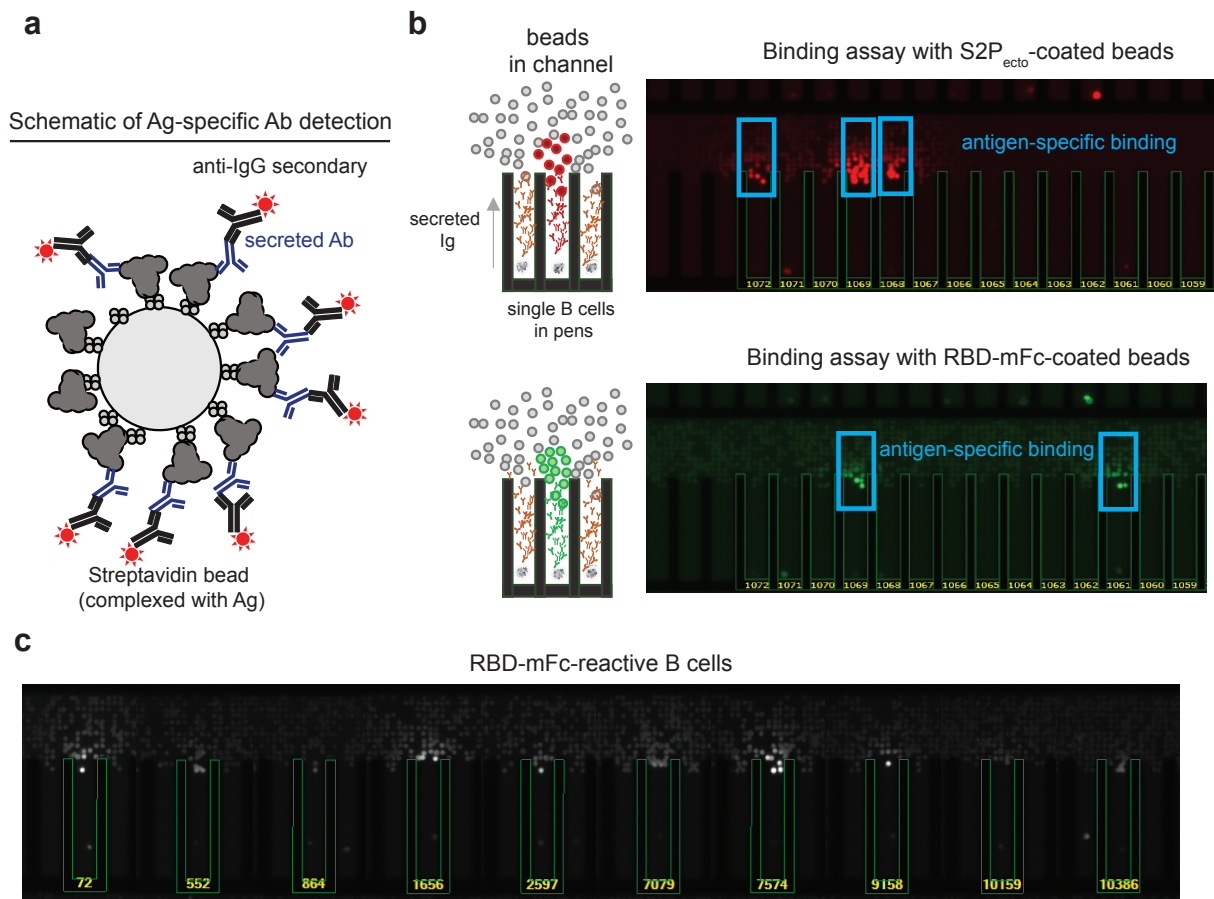

## Figure S3

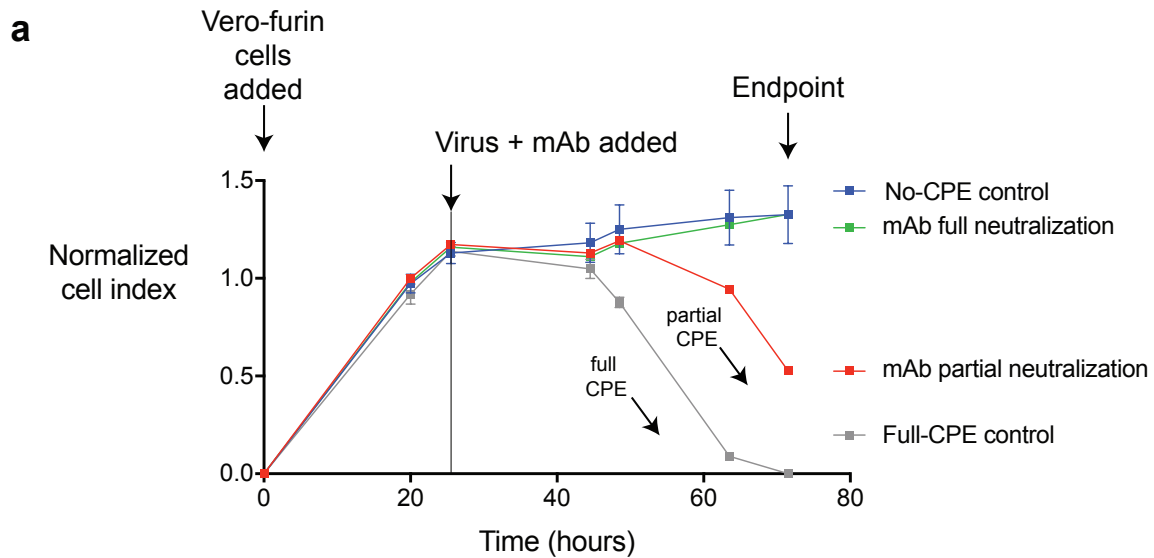

**b** Sensogram for cell impedance measurements over time, in 384-well plate assay

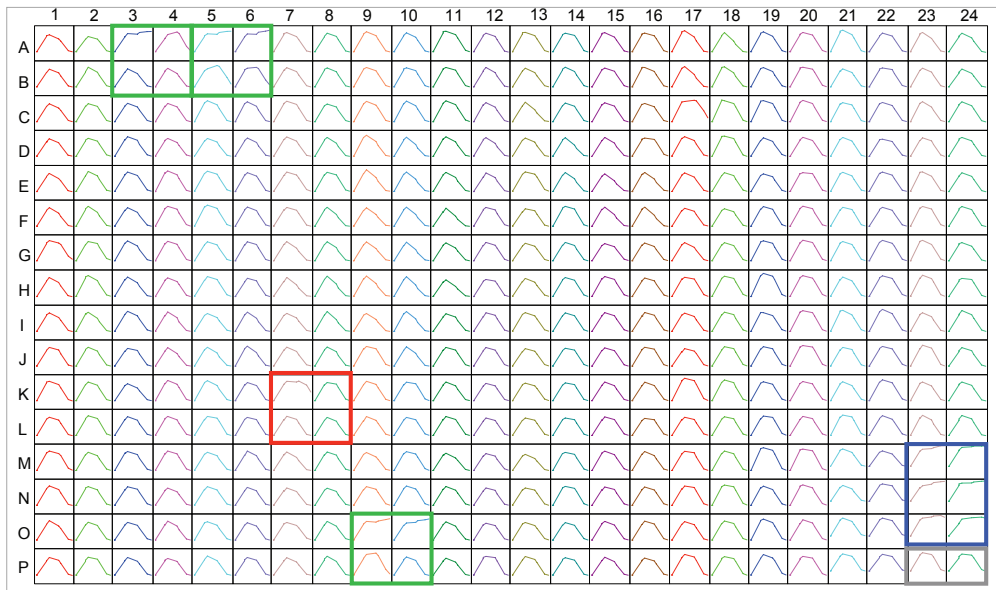

MAb  
fold-dilution  
schema

|     |       |
|-----|-------|
| 20  | 100   |
| 500 | 2,500 |

MAb neutralizing activity

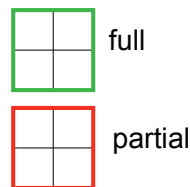

Control wells

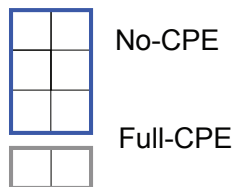

## Supplemental Tables

| <b>Table S1. Human subjects studied in this paper</b> |                |                    |            |                            |                              |                                                                   |
|-------------------------------------------------------|----------------|--------------------|------------|----------------------------|------------------------------|-------------------------------------------------------------------|
| <b>Subject type</b>                                   | <b>Subject</b> | <b>Age (years)</b> | <b>Sex</b> | <b>City where infected</b> | <b>Date of symptom onset</b> | <b>Date of blood sample collection (days after symptom onset)</b> |
| COVID-19                                              | 1              | 35                 | M          | Wuhan                      | Jan. 15, 2020                | February 19, 2020<br>(35 days)                                    |
|                                                       | 2              | 52                 | F          | Beijing                    | Feb. 1, 2020                 | March 8, 2020<br>(36 days)                                        |
|                                                       | 3              | 56                 | M          | Wuhan                      | Jan. 20, 2020                | March 10, 2020<br>(50 days)                                       |
|                                                       | 4              | 56                 | F          | Wuhan                      | Jan. 20, 2020                | March 10, 2020<br>(50 days)                                       |
| Healthy donors                                        | 5              | 58                 | M          | na                         | na                           | March 12, 2020<br>(na)                                            |
|                                                       | 6              | Unknown            | Unknown    | na                         | na                           | Unknown, commercially sourced healthy donor sample                |

na, indicates not applicable

**Table S2. Workflows used to isolate SARS-CoV-2 specific human mAbs from single B cells**

| Single B cell technique<br><br>(number of Ag-reactive mAbs recovered) | Ag used for cell sorting                    | Feeder layer stimulation | Functional screen on instrument | Sequencing technique<br><br>(cDNA used)      | Expression construct                      |
|-----------------------------------------------------------------------|---------------------------------------------|--------------------------|---------------------------------|----------------------------------------------|-------------------------------------------|
| Beacon<br><br>(n = 76)                                                | S2P <sub>ecto +/-</sub><br>S <sub>RBD</sub> | +                        | S2P <sub>ecto</sub> binding     | PacBio SMRT<br><br>(PCR amplicon)            | Directly cloned cDNA in pMCis_G1 vector   |
|                                                                       |                                             |                          | RBD-mFc binding                 |                                              |                                           |
|                                                                       |                                             |                          | RBD-mFc binding + ACE2 blocking |                                              |                                           |
| Chromium<br><br>(n = 310)                                             | S2P <sub>ecto</sub>                         | +                        | na                              | Illumina Novaseq<br><br>(Chromium libraries) | Synthesized cDNA in pTwist-mCis_G1 vector |
|                                                                       |                                             | -                        |                                 |                                              |                                           |
|                                                                       | S <sub>RBD</sub>                            | +                        |                                 |                                              |                                           |
|                                                                       |                                             | -                        |                                 |                                              |                                           |

| <b>Table S3. Summary of electron microscopy data collection and statistics SARS-CoV-2 S2P<sub>ecto</sub> protein</b> |                                            |             |
|----------------------------------------------------------------------------------------------------------------------|--------------------------------------------|-------------|
| Microscope setting                                                                                                   | Microscope                                 | TF-20       |
|                                                                                                                      | Voltage (kV)                               | 200         |
|                                                                                                                      | Detector                                   | US-4000 CCD |
|                                                                                                                      | Magnification                              | 50,000×     |
|                                                                                                                      | Pixel size                                 | 2.18        |
|                                                                                                                      | Exposure (e <sup>-</sup> /Å <sup>2</sup> ) | 25          |
|                                                                                                                      | Defocus range (μm)                         | 1.5 to 1.8  |
| Data                                                                                                                 | Micrographs, #                             | 122         |
|                                                                                                                      | Particles, #                               | 3,836       |
|                                                                                                                      | Particles, # after 2D                      | 2,718       |
|                                                                                                                      | Final particles, #                         | 2,188       |
|                                                                                                                      | Symmetry                                   | C1          |
| Model docking                                                                                                        |                                            | PDB: 6VXX   |
|                                                                                                                      | CoV-2 S CC                                 | 0.895       |

## 1 **Online Methods**

2

3 **Research subjects.** We studied four subjects in North America with recent laboratory-

4 confirmed symptomatic SARS-CoV-2 infection that were acquired in China (**Table S1**). The

5 studies were approved by the Institutional Review Board of Vanderbilt University Medical

6 Center, and subsite studies were approved by the Institutional Review Board of the

7 University of Washington or the Research Ethics Board of the University of Toronto. Samples

8 were obtained after written informed consent. Subject 1 (35-year-old male) was the earliest

9 reported case of SARS-CoV-2 infection in the U.S. who presented with disease in Seattle, WA

10 on January 19, 2020<sup>1</sup>, a blood sample was obtained for study on February 19, 2020. Subject 2

11 (52-year-old female) was infected following close exposure in Beijing, China to an infected

12 person from Wuhan, China during the period between January 23 to January 29, 2020. She

13 presented with mild respiratory disease symptoms from February 1 to 4, 2020 that occurred

14 after travel to Madison, Wisconsin, USA. She obtained a diagnosis of infection by testing at

15 the U.S. Centers for Disease Control on February 5, 2020. Blood samples were obtained for

16 study on March 7 and March 8, 2020. Subject 3 (a 56-year-old male) and subject 4 (a 56-year-

17 old female) are a married couple and residents of Wuhan, China who traveled to Toronto,

18 Canada on January 22, 2020. Subject 3 first developed a cough without fever on January 20,

19 2020 in the city of Wuhan, where he had a normal chest x-ray on that day. He flew to Canada

20 with persisting cough and arrived in Canada January 22, 2020 where he became febrile. He

21 presented to a hospital in Toronto, January 23, 2020 complaining of fever, cough and

22 shortness of breath; a nasopharyngeal swab was positive by PCR testing for SARS-CoV-2. His

23 chest x-ray at that time was abnormal, and he was admitted for non-ICU inpatient care. He

24 improved gradually with supportive care, was discharged January 30, 2020 and rapidly

25 became asymptomatic except for a residual dry cough that persisted for a month. He had a



26 negative nasopharyngeal swab PCR test on February 19, 2020. Subject 4 is the wife of subject 3  
27 who traveled with her husband from Wuhan. She was never symptomatic with respiratory  
28 symptoms or fever but was tested because of her exposure. Her nasopharyngeal swab was  
29 positive for SARS-CoV-2 by PCR, on January 24, 2020; repeat testing in followup on February  
30 21, 2020 was negative. PBMCs were obtained by leukopheresis from subjects 3 and 4 on  
31 March 10, 2020, which was 50 days since the symptom onset of subject 3. Samples were  
32 transferred to Vanderbilt University Medical Center in Nashville, TN, USA on March 14,  
33 2020.

34  
35 **Cell culture.** Vero E6 (CRL-1586, American Type Culture Collection (American Type  
36 Culture Collection, ATCC), Vero CCL81 (ATCC), HEK293 (ATCC), and HEK293T  
37 (ATCC) were maintained at 37°C in 5% CO<sub>2</sub> in Dulbecco's minimal essential medium  
38 (DMEM) containing 10% (vol/vol) heat-inactivated fetal bovine serum (FBS), 10 mM  
39 HEPES pH 7.3, 1 mM sodium pyruvate, 1× non-essential amino acids, and 100 U/mL of  
40 penicillin–streptomycin. Vero-furin cells were obtained from T. Pierson (NIH) and have  
41 been described previously<sup>2</sup>. Expi293F cells (ThermoFisher Scientific, A1452) were  
42 maintained at 37°C in 8% CO<sub>2</sub> in Expi293F Expression Medium (ThermoFisher  
43 Scientific, A1435102). ExpiCHO cells (ThermoFisher Scientific, A29127) were  
44 maintained at 37°C in 8% CO<sub>2</sub> in ExpiCHO Expression Medium (ThermoFisher  
45 Scientific, A2910002). Mycoplasma testing of Expi293F and ExpiCHO cultures was  
46 performed on a monthly basis using a PCR-based mycoplasma detection kit (ATCC, 30-  
47 1012K).

48  
49 **Viruses.** SARS-CoV-2 strain 2019 n-CoV/USA\_WA1/2020 was obtained from the Centers for  
50 Disease Control and Prevention (a gift from Natalie Thornburg). Virus was passaged in Vero

51 CCL81 cells and titrated by plaque assay on Vero E6 cells. All work with infectious SARS-  
52 CoV-2 was approved by the Washington University School of Medicine or UNC-Chapel Hill  
53 Institutional Biosafety Committees and conducted in approved BSL3 facilities using  
54 appropriate powered air purifying respirators and personal protective equipment.

55  
56 **Recombinant antigens and proteins.** A gene encoding the ectodomain of a prefusion  
57 conformation-stabilized SARS-CoV-2 spike ( $S2P_{\text{ecto}}$ ) protein was synthesized and cloned into a  
58 DNA plasmid expression vector for mammalian cells. A similarly designed S protein antigen  
59 with two prolines and removal of the furin cleavage site for stabilization of the prefusion form  
60 of S was reported previously<sup>3</sup>. Briefly, this gene includes the ectodomain of SARS-CoV-2 (to  
61 residue 1,208), a T4 fibritin trimerization domain, an AviTag site-specific biotinylation  
62 sequence, and a C-terminal 8x-His tag. To stabilize the construct in the prefusion  
63 conformation, we included substitutions K968P and V969P and mutated the furin cleavage  
64 site at residues 682-685 from RRAR to ASVG. This recombinant spike 2P-stabilized protein  
65 (designated here as  $S2P_{\text{ecto}}$ ) was isolated by metal affinity chromatography on HisTrap Excel  
66 columns (GE Healthcare), and protein preparations were purified further by size-exclusion  
67 chromatography on a Superose 6 Increase 10/300 column (GE Healthcare). The presence of  
68 trimeric, prefusion conformation S protein was verified by negative-stain electron microscopy  
69 (**Figure S1**). To express the  $S_{\text{RBD}}$  subdomain of SARS-CoV-2 S protein, residues 319-541 were  
70 cloned into a mammalian expression vector downstream of an IL-2 signal peptide and  
71 upstream of a thrombin cleavage site, an AviTag, and a 6x-His tag. RBD protein fused to  
72 mouse IgG1 Fc domain (designated RBD-mFc), was purchased from Sino Biological (40592-  
73 V05H). For B cell labeling and sorting, RBD-mFc and  $S2P_{\text{ecto}}$  proteins were biotinylated using  
74 the EZ-Link™ Sulfo-NHS-LC-Biotinylation Kit and vendor's protocol (ThermoFisher  
75 Scientific, 21435).

76

77 **Electron microscopy (EM) stain grid preparation and imaging of SARS-CoV-2 S2P<sub>ecto</sub>**  
78 **protein.** For screening and imaging of negatively-stained (NS) SARS-CoV-2 S2P<sub>ecto</sub>  
79 protein, approximately 3  $\mu$ L of the sample at concentrations of about 10 to 15  $\mu$ g/mL  
80 was applied to a glow discharged grid with continuous carbon film on 400 square mesh  
81 copper EM grids (Electron Microscopy Sciences, Hatfield, PA). The grids were stained  
82 with 0.75% uranyl formate (UF)<sup>4</sup>. Images were recorded on a Gatan US4000 4k  $\times$  4k  
83 CCD camera using an FEI TF20 (TFS) transmission electron microscope operated at 200  
84 keV and control with SerialEM<sup>5</sup>. All images were taken at 50,000 $\times$  magnification with a  
85 pixel size of 2.18  $\text{\AA}$ /pix in low-dose mode at a defocus of 1.5 to 1.8  $\mu$ m. Total dose for  
86 the micrographs was  $\sim 25 \text{ e}^- / \text{\AA}^2$ . Image processing was performed using the  
87 cryoSPARC software package<sup>6</sup>. Images were imported, and particles were CTF  
88 estimated. The images then were denoised and picked with Topaz<sup>7</sup>. The particles were  
89 extracted with a box size of 256 pixels and binned to 128 pixels. 2D class averages were  
90 performed and good classes selected for *ab-initio* model and refinement without  
91 symmetry (see also **Table S3** for details). For EM model docking of SARS-CoV-2 S2P<sub>ecto</sub>  
92 protein, the closed model (PDB: 6VXX) was used in Chimera<sup>8</sup> for docking to the EM  
93 map (see also **Table S3** for details).

94

95 **Human subject selection and target-specific memory B cells isolation.** B cell responses to  
96 SARS-CoV-2 in PBMCs from a cohort of four subjects with documented previous infection  
97 with the virus were analyzed for antigen specificity, and PBMCs were used for SARS-CoV-2-  
98 specific B cell enrichment. The frequency of SARS-CoV-2 S protein-specific B cells was  
99 identified by antigen-specific staining with either biotinylated S2P<sub>ecto</sub> or RBD-mFc protein.

100 Briefly, B cells were purified magnetically (STEMCELL Technologies) and stained with anti-  
101 CD19-APC (clone HIB19, 982406), -IgD-FITC (clone LA6-2, 348206), and -IgM-FITC (clone  
102 MNM-88, 314506) phenotyping antibodies (BioLegend) and biotinylated antigen. A 4',6-  
103 diamidino-2-phenylindole (DAPI) stain was used as a viability dye to discriminate dead cells.  
104 Antigen-labeled class-switched memory B cell-antigen complexes (CD19<sup>+</sup>IgM<sup>+</sup>IgD<sup>+</sup>Ag<sup>+</sup>DAPI<sup>+</sup>)  
105 were detected with a R-phycoerythrin (PE)-labeled streptavidin conjugate (ThermoFisher  
106 Scientific, S866). After identification of the two subjects with the highest B cell response  
107 against SARS-CoV-2 (subjects 3 and 4), target-specific memory B cells were isolated by flow  
108 cytometric sorting using an SH800 cell sorter (Sony) from pooled PBMCs of these two  
109 subjects, after labeling of B cells with either biotinylated S2P<sub>ecto</sub> or RBD-mFc proteins.

110  
111 Overall, from  $> 4 \times 10^8$  PBMCs, 2,126 RBD-mFc-reactive and 5,544 S2P<sub>ecto</sub> protein-reactive B  
112 cells were sorted and subjected to further analysis. Several methods were implemented for the  
113 preparation of sorted B cells for sequencing. Approximately 4,500 sorted cells were subjected  
114 to direct sequencing immediately after flow cytometric sorting. The remaining cells were  
115 expanded in culture for eight days in the presence of irradiated 3T3 feeder cells that were  
116 engineered to express human CD40L, IL-21, and BAFF, as described previously<sup>9</sup>. The  
117 expanded lymphoblastoid cell lines (LCLs) secreted high levels of S protein-specific  
118 antibodies, as confirmed by ELISA to detect antigen-specific human antibodies in culture  
119 supernatants. Approximately 40,000 expanded LCLs were sequenced using the Chromium  
120 sequencing method (10x Genomics).

121  
122 **Microfluidic device selection of single antigen-specific B cells.** Activated memory B  
123 cells were screened using Berkeley Lights' Beacon<sup>®</sup>™ optofluidic system. Purified B cell  
124 samples were imported automatically onto OptoSelect™ 11k chips in a novel

125 plasmablast survival medium that promotes antibody secretion and preserves cell  
126 viability<sup>10</sup>. Single-cell penning was then performed using OEP™ technology in which  
127 light is used to transfer B cells into individual nanoliter-volume chambers  
128 (NanoPens™). Using this light-based manipulation, thousands of LCLs were  
129 transferred into pens across multiple chips in each workflow. We performed an on-chip,  
130 fluorescence-based assay to identify antibodies that bound SARS-CoV-2 S2P<sub>ecto</sub> or RBD-  
131 mFc protein. We prepared 6- to 8-micron and 10- to 14-micron RBD-mFc-conjugated  
132 beads by coupling biotinylated RBD-mFc protein to streptavidin-coated polystyrene  
133 particles (Spherotech Inc.). We prepared 6- to 8-micron S2P<sub>ecto</sub> protein-conjugated beads  
134 by coupling full-length S2P<sub>ecto</sub> protein to streptavidin-coated polystyrene particles.  
135 Assays consisted of mixing beads conjugated with the RBD-mFc or S2P<sub>ecto</sub> proteins with  
136 fluorescently-labeled anti-human secondary antibodies (AF568, Thermo Fisher  
137 Scientific) and importing this assay mixture into OptoSelect 11k chips. Antigen-specific  
138 antibodies bound the antigen-conjugated beads, which then sequestered the fluorescent  
139 secondary antibody. Cells secreting antigen-specific antibodies were identified by  
140 locating the NanoPens immediately adjacent to the fluorescent beads. Antigen-specific  
141 cells of interest were exported from specific NanoPen chambers to individual wells of  
142 96-well RT-PCR plates containing lysis buffer.

143  
144 **Sequencing and cloning of single antigen-specific B cells.** After export from the Beacon,  
145 antibody heavy and light chain sequences for B cells secreting antibodies with RBD-mFc- or  
146 S2P<sub>ecto</sub>-binding antibodies were amplified and recovered using components of the  
147 Opto™ Plasma B Discovery cDNA Synthesis Kit (Berkeley Lights). Antibody heavy and light  
148 chain sequences were amplified through a 5'RACE approach using the kit's included "BCR  
149 Primer 2" forward primer and isotype-specific reverse primers. The 5'-RACE amplified cDNA

150 was sequenced using the Pacific Biosciences Sequel platform using the SMRTbell Barcoded  
151 Adapt Complete Prep-96 kit (Pacific Biosciences) and a 6-hour movie time. In a redundant  
152 sequencing approach, heavy and light chain sequences were amplified using a cocktail of  
153 custom V and J gene-specific primers (similar to previously described human Ig gene-specific  
154 primers<sup>11</sup>) from the original 5'-RACE-amplified cDNA while the products of the gene-specific  
155 amplification were sent for Sanger sequencing (GENEWIZ). The sequences generated by these  
156 two approaches were analyzed using our Python-based antibody variable gene analysis tool  
157 (PyIR; <https://github.com/crowelab/PyIR>)<sup>12</sup> to identify which V and J genes most closely  
158 matched the nucleotide sequence. Heavy and light chain sequences were then amplified from  
159 the original cDNA using cherry-picked V and J gene-specific primers most closely  
160 corresponding to the V and J gene calls made by PyIR. These primers include adapter  
161 sequences which allow Gibson-based cloning into a monocistronic IgG1 expression vector  
162 (pMCis\_G1). Similar to a vector described below, this vector contains an enhanced 2A  
163 sequence and GSG linker that allows simultaneous expression of mAb heavy and light chain  
164 genes from a single construct upon transfection<sup>13</sup>. The pMCis\_G1 vector was digested using  
165 the New England BioLabs restriction enzyme FspI, and the amplified paired heavy and light  
166 chain sequences were cloned through Gibson assembly using NEBuilder HiFi DNA Assembly  
167 Master Mix. After recovered sequences were cloned into pMCis\_G1 expression constructs,  
168 recombinant antibodies were expressed in Chinese hamster ovary (CHO) cells and purified  
169 by affinity chromatography as detailed below. Antigen-binding activity was confirmed using  
170 plate-based ELISA.

171  
172 **Generation of single-cell antibody variable genes profiling libraries.** As an alternative  
173 approach, we also used a second major approach for isolation of SARS-CoV-2-reactive  
174 antibodies. In some experiments, the Chromium Single Cell V(D)J workflow with B-cell only

175 enrichment option was used for generating linked heavy-chain and light-chain antibody  
176 profiling libraries. Approximately 2,866 directly sorted S2P<sub>ecto</sub> or 1,626 RBD-mFc protein-  
177 specific B cells were split evenly into two replicates each and separately added to 50 µL of RT  
178 Reagent Mix, 5.9 µL of Poly-dt RT Primer, 2.4 µL of Additive A and 10 µL of RT Enzyme Mix  
179 B to complete the Reaction Mix as per the vendor's protocol, which then was loaded directly  
180 onto a Chromium chip (10x Genomics). Similarly, for the remaining sorted cells that were  
181 expanded in bulk, approximately 40,000 cells from two separate sorting approaches were split  
182 evenly across four reactions and processed separately as described above before loading onto  
183 a Chromium chip. The libraries were prepared following the User Guide for Chromium  
184 Single Cell V(D)J Reagents kits (CG000086\_REV C).

185  
186 **Next generation DNA sequence analysis of antibody variable genes.** Chromium Single Cell  
187 V(D)J B-Cell enriched libraries were quantified, normalized and sequenced according to the  
188 User Guide for Chromium Single Cell V(D)J Reagents kits (CG000086\_REV C). The two  
189 enriched libraries from direct flow cytometric cell sorting were sequenced on a NovaSeq  
190 sequencer (Illumina) with a NovaSeq 6000 S1 Reagent Kit (300 cycles) (Illumina). The four  
191 enriched libraries from bulk expansion were sequenced on a NovaSeq sequencer with a  
192 NovaSeq 6000 S4 Reagent Kit (300 cycles (Illumina). All enriched V(D)J libraries were targeted  
193 for sequencing depth of at least 5,000 raw read pairs per cell. Following sequencing, all  
194 samples were demultiplexed and processed through the 10x Genomics Cell Ranger software  
195 (version 2.1.1) as below.

196  
197 **Bioinformatics analysis of single-cell sequencing data.** The down-selection to identify lead  
198 candidates for expression was carried out in two phases. In the first phase, all paired antibody  
199 heavy and light chain variable gene cDNA nucleotide sequences obtained that contained a

200 single heavy and light chain sequence were processed using PyIR. We considered heavy and  
201 light chain encoding gene pairs productive and retained them for additional downstream  
202 processing if they met the following criteria: 1) did not contain a stop codon, 2) encoded an  
203 intact CDR3 and 3) contained an in-frame junctional region. The second phase of processing  
204 eliminated redundant sequences (those with identical amino acid sequences). Any antibody  
205 variant that was designated as an IgM isotype (based on the sequence and assignment using  
206 the 10x Genomics Cell Ranger V(D)J software [version 2.1.1]) was removed from  
207 consideration (while IgG and IgA isotype antibodies were retained). The identities of  
208 antibody variable gene segments, CDRs, and mutations from inferred germline gene  
209 segments were determined by using PyIR.

210  
211 **Antibody gene synthesis.** Sequences of selected mAbs were synthesized using a rapid high-  
212 throughput cDNA synthesis platform (Twist Bioscience) and subsequently cloned into an  
213 IgG1 monocistronic expression vector (designated as pTwist-mCis\_G1) for mammalian cell  
214 culture mAb secretion. This vector contains an enhanced 2A sequence and GSG linker that  
215 allows simultaneous expression of mAb heavy and light chain genes from a single construct  
216 upon transfection<sup>13</sup>.

217  
218 **MAb production and purification.** For high-throughput production of recombinant mAbs,  
219 we adopted approaches designated as “micro-scale” or “midi-scale”. For “micro-scale”  
220 mAbs expression, we performed micro-scale transfection (~1 mL per antibody) of CHO cell  
221 cultures using the Gibco™ ExpiCHO™ Expression System and a protocol for deep 96-well  
222 blocks (ThermoFisher Scientific) as detailed in accompanying manuscript<sup>14</sup>. Briefly,  
223 synthesized antibody-encoding lyophilized DNA was reconstituted in OptiPro serum-free  
224 medium (OptiPro SFM) and used for transfection of ExpiCHO cell cultures into 96-deep-



225 well blocks. For high-throughput micro-scale mAbs purification, clarified culture  
226 supernatants were incubated with MabSelect SuRe resin (Cytiva, formerly GE Healthcare  
227 Life Sciences), washed with PBS, eluted, buffer-exchanged into PBS using Zeba™ Spin  
228 Desalting Plates (Thermo Fisher Scientific) and stored at 4°C until use. For “midi-scale”  
229 mAbs expression, we performed transfection (~15 mL per antibody) of CHO cell cultures  
230 using the Gibco™ ExpiCHO™ Expression System and protocol for 50 mL mini bioreactor  
231 tubes (Corning) as described by the vendor. For high-throughput midi-scale mAb  
232 purification, culture supernatants were purified using HiTrap MabSelect SuRe (Cytiva,  
233 formerly GE Healthcare Life Sciences) on a 24-column parallel protein chromatography  
234 system (Protein BioSolutions). Purified mAbs were buffer-exchanged into PBS,  
235 concentrated using Amicon® Ultra-4 50KDa Centrifugal Filter Units (Millipore Sigma) and  
236 stored at 4°C until use.

237  
238 **ELISA binding screening assays.** Wells of 96-well microtiter plates were coated with  
239 purified recombinant SARS-CoV-2 S protein, SARS-CoV-2 S<sub>RBD</sub> protein, SARS-CoV-2 S<sub>NTD</sub>  
240 (kindly provided by Nicole Kallewaard-Lelay, Astra Zeneca) or SARS-CoV S protein  
241 (kindly provided by Sandhya Bangaru and Andrew Ward, The Scripps Research Institute)  
242 at 4°C overnight. Plates were blocked with 2% non-fat dry milk and 2% normal goat serum  
243 in DPBS containing 0.05% Tween-20 (DPBS-T) for 1 hr. For mAb screening assays, CHO cell  
244 culture supernatants or purified mAbs were diluted 1:20 in blocking buffer, added to the  
245 wells, and incubated for 1 hr at ambient temperature. The bound antibodies were detected  
246 using goat anti-human IgG conjugated with HRP (horseradish peroxidase) (Southern  
247 Biotech) and TMB (3,3',5,5'-tetramethylbenzidine) substrate (Thermo Fisher Scientific).  
248 Color development was monitored, 1N hydrochloric acid was added to stop the reaction,

249 and the absorbance was measured at 450 nm using a spectrophotometer (Biotek). For dose-  
250 response assays, serial dilutions of purified mAbs were applied to the wells in triplicate,  
251 and mAb binding was detected as detailed above. Half-maximal effective concentration  
252 ( $EC_{50}$ ) values for binding were determined using Prism v8.0 software (GraphPad) after log  
253 transformation of mAb concentration using sigmoidal dose-response nonlinear regression  
254 analysis.

255  
256 **Real-time cell analysis assay (RTCA).** To screen for neutralizing activity in the panel of  
257 recombinantly expressed mAbs, we used a high-throughput and quantitative real-time cell  
258 analysis (RTCA) assay and xCelligence RTCA HT Analyzer (ACEA Biosciences Inc.) that  
259 assesses kinetic changes in cell physiology, including virus-induced cytopathic effect  
260 (CPE). Twenty (20)  $\mu$ L of cell culture medium (DMEM supplemented with 2% FBS) was  
261 added to each well of a 96-well E-plate using a ViaFlo384 liquid handler (Integra  
262 Biosciences) to obtain background reading. Six thousand (6,000) Vero-furin cells in 20  $\mu$ L of  
263 cell culture medium were seeded per each well, and the plate was placed on the analyzer.  
264 Sensograms were visualized using RTCA HT software version 1.0.1 (ACEA Biosciences  
265 Inc). For a screening neutralization assay, equal amounts of virus were mixed with micro-  
266 scale purified Abs in a total volume of 40  $\mu$ L using DMEM supplemented with 2% FBS as a  
267 diluent and incubated for 1 hr at 37°C in 5% CO<sub>2</sub>. At ~17-20 hrs after seeding the cells, the  
268 virus-mAb mixtures were added to the cells in 384-well E-plates. Wells containing virus  
269 only (in the absence of mAb) and wells containing only Vero cells in medium were  
270 included as controls. Plates were measured every 8-12 hours for 48 to 72 hrs to assess virus  
271 neutralization. Micro-scale antibodies were assessed in four 5-fold dilutions (starting from  
272 a 1:20 sample dilution), and their concentrations were not normalized. In some experiments

273 mAbs were tested in triplicate using a single (1:20) dilution. Neutralization was calculated  
274 as the percent of maximal cell index in control wells without virus minus cell index in  
275 control (virus-only) wells that exhibited maximal CPE at 40 to 48 hrs after applying virus-  
276 antibody mixture to the cells. A mAb was classified as fully neutralizing if it completely  
277 inhibited SARS-CoV-2-induced CPE at the highest tested concentration, while a mAb was  
278 classified as partially neutralizing if it delayed but did not fully prevent CPE at the highest  
279 tested concentration. Representative sensograms for fully neutralizing and partially  
280 neutralizing mAbs are shown in Figure S3. For mAb potency ranking experiments,  
281 individual mAbs identified as fully neutralizing from the screening study were assessed by  
282 FRNT.

283

284 **Sequence analysis of antigen-reactive mAb sequences.** Sequences of the 386 mAbs  
285 isolated by different approaches were combined and run through PyIR to identify the V  
286 genes, J genes, CDR3 lengths, and percent identity to germline, and sequence within the  
287 FR1-FR4 region for both heavy and light chains. Sequences were then deduplicated on  
288 the nucleotide sequences identified in the FR1-FR4 region. Among the 386 mAbs, there  
289 were 324 unique nucleotide sequences that were analyzed for V/D/J gene usage, CDR3  
290 length, and somatic mutation. First, the number of sequences with corresponding V and  
291 J genes were counted. The V/J frequency counts were then transformed into a z-score  
292 by first subtracting away the average frequency then normalizing by the standard  
293 deviation of each subject. The z-score was then plotted as a heatmap using python  
294 seaborn library. The amino acid length of each CDR3 was counted. The distribution of  
295 CDR3 amino acid lengths were then plotted as histograms and fitted using kernel  
296 density estimation for the curves using python seaborn library. The number of  
297 mutations from each inferred germ-line sequence starting from FR-1 to FR4 was

298 counted up for each chain. This number was then transformed into a percentage value.  
299 These values are then plotted as a categorical distribution plot as a violin plot using the  
300 python seaborn.catplot library.

301

302 **Focus reduction neutralization test (FRNT).** Serial dilutions of mAbs were incubated  
303 with  $10^2$  FFU of SARS-CoV-2 for 1 hr at 37°C. The mAb–virus complexes were added to  
304 Vero E6 cell monolayers in 96-well plates for 1 hr at 37°C. Subsequently, cells were  
305 overlaid with 1% (w/v) methylcellulose in Minimum Essential Medium (MEM)  
306 supplemented to contain 2% heat-inactivated FBS. Plates were fixed 30 hrs later by  
307 removing overlays and fixed with 4% PFA in PBS for 20 min at room temperature. The  
308 plates were incubated sequentially with 1  $\mu\text{g}/\text{mL}$  of rCR3022 anti-S antibody<sup>15</sup> and  
309 horseradish-peroxidase (HRP)-conjugated goat anti-human IgG in PBS supplemented  
310 with 0.1% (w/v) saponin (Sigma) and 0.1% bovine serum albumin (BSA). SARS-CoV-2-  
311 infected cell foci were visualized using TrueBlue peroxidase substrate (KPL) and  
312 quantitated on an ImmunoSpot 5.0.37 Macro Analyzer (Cellular Technologies).

313

314 **SARS-CoV neutralization assays using SARS-CoV luciferase reporter virus.** Full-  
315 length viruses expressing luciferase were designed and recovered via reverse genetics  
316 and described previously.<sup>16,17</sup> Viruses were titered in Vero E6 USAMRID cell culture  
317 monolayers to obtain a relative light units (RLU) signal of at least 20X the cell-only  
318 control background. Vero E6 USAMRID cells were plated at 20,000 cells per well the  
319 day prior in clear-bottom black-walled 96-well plates (Corning #3904). Neutralizing  
320 antibodies were diluted serially 4-fold up to eight dilution times. SARS-Urbani  
321 NanoLuc virus was mixed with serially diluted antibodies. Antibody-virus complexes  
322 were incubated at 37°C in 5% CO<sub>2</sub> for 1 hr. Following incubation, growth medium was

323 removed and virus-antibody dilution complexes were added to the cells in duplicate.  
324 Virus-only and cell-only controls were included in each neutralization assay plate.  
325 Following infection, plates were incubated at 37°C in 5% CO<sub>2</sub> for 48 hours. After the 48-  
326 hour incubation, cells were lysed and luciferase activity was measured using the Nano-  
327 Glo Luciferase Assay System (Promega), according to the manufacturer's specifications.  
328

329 **High-throughput mAb quantification.** High-throughput quantification of micro-scale  
330 produced mAbs was performed from CHO culture supernatants or micro-scale purified  
331 mAbs in a 96-well plate format using the Cy-Clone Plus Kit and an iQue Plus Screener flow  
332 cytometer (IntelliCyt Corp), according to the vendor's protocol. Purified mAbs were assessed  
333 at a single dilution (1:10 final, using 2 µL of purified mAb per reaction), and a control human  
334 IgG solution with known concentration was used to generate a calibration curve. Data were  
335 analyzed using ForeCyt software version 6.2 (IntelliCyt Corp).

336  
337 **Quantification and statistical analysis.** The descriptive statistics mean ± SEM or mean ±  
338 SD were determined for continuous variables as noted. Technical and biological replicates  
339 are described in the figure legends. Statistical analyses were performed using Prism v8.0  
340 (GraphPad).

341  
342

343 **References for Online Methods**

344

345 1. Holshue, M.L., *et al.* First case of 2019 novel coronavirus in the United States. *N*  
346 *Engl J Med* **382**, 929-936 (2020).

347

348 2. Mukherjee, S., *et al.* Enhancing dengue virus maturation using a stable furin  
349 over-expressing cell line. *Virology* **497**, 33-40 (2016).

350

351 3. Wrapp, D., *et al.* Cryo-EM structure of the 2019-nCoV spike in the prefusion  
352 conformation. *Science* **367**, 1260-1263 (2020).

353

354 4. Ohi, M., Li, Y., Cheng, Y. & Walz, T. Negative staining and image classification -  
355 Powerful tools in modern electron microscopy. *Biol Proced Online* **6**, 23-34 (2004).

356

357 5. Mastronarde, D.N. Automated electron microscope tomography using robust  
358 prediction of specimen movements. *J Struct Biol* **152**, 36-51 (2005).

359

360 6. Punjani, A., Rubinstein, J.L., Fleet, D.J. & Brubaker, M.A. cryoSPARC: algorithms  
361 for rapid unsupervised cryo-EM structure determination. *Nat Methods* **14**, 290-296  
362 (2017).

363

364 7. Bepler, T., Noble, A. J., and Berger, B. Topaz-Denoise: general deep denoising  
365 models for cryoEM. *bioRxiv*. (2019). DOI: 10.1101/838920

366

- 367 8. Pettersen, E.F., *et al.* UCSF Chimera--a visualization system for exploratory  
368 research and analysis. *J Comput Chem* **25**, 1605-1612 (2004).  
369
- 370 9. Gilchuk, P., *et al.* Analysis of a therapeutic antibody cocktail reveals determinants  
371 for cooperative and broad ebolavirus neutralization. *Immunity* **52**, 388-403 e312  
372 (2020).  
373
- 374 10. Nguyen, D.C., *et al.* Factors of the bone marrow microniche that support human  
375 plasma cell survival and immunoglobulin secretion. *Nat Commun* **9**, 3698 (2018).  
376
- 377 11. Guthmiller, J.J., Dugan, H.L., Neu, K.E., Lan, L.Y. & Wilson, P.C. An efficient  
378 method to generate monoclonal antibodies from human B cells. *Methods Mol Biol*  
379 **1904**, 109-145 (2019).  
380
- 381 12. Soto C, F.J., Willis JR, Day SB, Sinkovits RS, Jones T, Schmitz S, Meiler J,  
382 Branchizio A, Crowe JE Jr. . PyIR: A scalable wrapper for processing billions of  
383 immunoglobulin and T cell receptor sequences using IgBLAST. (2020). *Submitted*.  
384
- 385 13. Chng, J., *et al.* Cleavage efficient 2A peptides for high level monoclonal antibody  
386 expression in CHO cells. *MAbs* **7**, 403-412 (2015).  
387
- 388 14. Gilchuk P, B.R., Erasmus JH, Durnel LA, Nargi R, Soto C, Abbink P, Suscovich  
389 TJ, Tan Q, Khandhar A, Archer J, Bryan A, Davidson E, Doranz BJ, Fouch ME,  
390 Jones T, Larson E, Ertel S, Granger B, Fuerte-Stone J, Roy V, Broge T, Linnekin  
391 TC, Linde CH, Gorman MJ, Nkolola J, Galit Alter G, Steven G Reed SG, Daniel H

- 392 Barouch DH, Michael S Diamond MS, Crowe JE Jr, Neal Hoeven N, Thackray L,  
393 Carnahan R. Integrated technology platform for accelerated discovery of  
394 antiviral antibody therapeutics. *Nature Medicine* (2020). *Submitted*.  
395
- 396 15. Yuan, M., *et al.* A highly conserved cryptic epitope in the receptor binding  
397 domains of SARS-CoV-2 and SARS-CoV. *Science* **368**, 630-633 (2020).  
398
- 399 16. Scobey, T., *et al.* Reverse genetics with a full-length infectious cDNA of the  
400 Middle East respiratory syndrome coronavirus. *Proc Natl Acad Sci U S A* **110**,  
401 16157-16162 (2013).  
402
- 403 17. Yount, B., *et al.* Reverse genetics with a full-length infectious cDNA of severe  
404 acute respiratory syndrome coronavirus. *Proc Natl Acad Sci U S A* **100**, 12995-  
405 13000 (2003).  
406
